# Supplementary material for: A system for enhancing genome-wide coexpression dynamics study
Source: HighWire-hosted journal article supplement (doi:10.1073/pnas.0402962101), 2004-10-18
Supplement: 02962Table16.pdf [file 02962Table16.pdf]

| Table 16. LA for X=APP, Y=GSK3A ([3':AA054508,5':AA054372]) |          |                                                                                                      |
|-------------------------------------------------------------|----------|------------------------------------------------------------------------------------------------------|
| GSK3A                                                       |          | glycogen synthase kinase 3 alpha [3':AA054508,5':AA054372]                                           |
| APP                                                         |          | amyloid beta (A4) precursor protein (protease nexin-II, Alzheimer disease) [3':AA033842,5':AA034297] |
| Gene Name                                                   | LA Score | Gene Information                                                                                     |
| ADAM15                                                      | 0.486    | a disintegrin and metalloproteinase domain 15 (metargidin) [3':AA007366,5':AA007462]                 |
| PRCP                                                        | 0.437    | prolylcarboxypeptidase (angiotensinase C) [3':T78895,5':T78947]                                      |
| MIF                                                         | 0.406    | macrophage migration inhibitory factor (glycosylation-inhibiting factor) [3':AA045695,5':AA045694]   |
| DP1                                                         | 0.395    | likely ortholog of mouse deleted in polyposis 1 [3':AA044805,5':AA044782]                            |
| NA-975                                                      | 0.386    | EST [3':R43776*,5':R25018]                                                                           |
| PLTP                                                        | 0.381    | phospholipid transfer protein [3':AA047118,5':AA047117]                                              |
| C11orf25                                                    | 0.371    | chromosome 11 open reading frame 25 [3':N48295,5':N49022]                                            |
| CDH17                                                       | 0.371    | cadherin 17, LI cadherin (liver-intestine) [3':AA053102,5':AA053188]                                 |
| SGSH                                                        | 0.369    | N-sulfoglucosamine sulfohydrolase (sulfamidase) [3':H11473*,5':NA]                                   |
| LARGE                                                       | 0.369    | like-glycosyltransferase [3':AA047380,5':AA057038]                                                   |
| PRKCD                                                       | 0.367    | protein kinase C, delta [3':AA005215,5':AA005214]                                                    |
| ATP6IP2                                                     | 0.366    | ATPase, H <sup>+</sup> transporting, lysosomal interacting protein 2 [3':AA053862,5':AA054183]       |
| ACPS5                                                       | 0.364    | acid phosphatase 5, tartrate resistant [3':R08817,5':R08816]                                         |
| SSAT2                                                       | 0.364    | polyamine N-acetyltransferase [3':W68048,5':W68190]                                                  |
| BACE2                                                       | 0.364    | beta-site APP-cleaving enzyme 2 [3':AA035768,5':AA056282]                                            |
| LGALS3                                                      | 0.359    | lectin, galactoside-binding, soluble, 3 (galectin 3) [3':AA052939,5':AA053492]                       |
| IL6ST                                                       | 0.358    | interleukin 6 signal transducer (gp130, oncostatin M receptor) [3':H85457,5':H85741*]                |
| FLJ21347                                                    | 0.357    | hypothetical protein FLJ21347 [3':H15544,5':H15603]                                                  |
| LRP10                                                       | 0.356    | low density lipoprotein receptor-related protein 10 [3':AA039978,5':AA040020]                        |
| NA-3317                                                     | 0.351    | ESTs [3':H84465,5':H84464]                                                                           |
| SPS                                                         | -0.415   | selenium donor protein [3':W94676,5':W95145]                                                         |
| CCND3                                                       | -0.411   | cyclin D3 [3':N94440,5':W30788]                                                                      |
| TAL1                                                        | -0.411   | T-cell acute lymphocytic leukemia 1 [3':T97345,5':T97441]                                            |
| MGC9651                                                     | -0.407   | hypothetical protein MGC9651 [3':AA033829,5':AA033886]                                               |
| C2orf6                                                      | -0.402   | chromosome 2 open reading frame 6 [3':W86554,5':W86553]                                              |
| APC4                                                        | -0.402   | anaphase-promoting complex subunit 4 [3':AA025406,5':AA025405]                                       |
| FLJ12903                                                    | -0.399   | hypothetical protein FLJ12903 [3':AA022470,5':AA023003]                                              |
| MGC40413                                                    | -0.399   | hypothetical protein MGC40413 [3':W72362,5':W74041]                                                  |
| ANKT                                                        | -0.398   | nucleolar protein ANKT [3':AA041459,5':AA041512]                                                     |
| NA-1368                                                     | -0.396   | ESTs [3':R66324*,5':R66323]                                                                          |
| NIP30                                                       | -0.395   | NEFA-interacting nuclear protein NIP30 [3':AA055223,5':AA055222]                                     |
| CXCL14                                                      | -0.393   | chemokine (C-X-C motif) ligand 14 [3':AA058948,5':AA059409]                                          |
| GORASP2                                                     | -0.391   | Golgi reassembly stacking protein 2, 55 kDa [3':AA026286,5':AA026285]                                |
| ATP11A                                                      | -0.389   | ATPase, Class VI, type 11A [3':AA020973,5':AA021045]                                                 |
| TCF3                                                        | -0.382   | transcription factor 3 (E2A immunoglobulin enhancer binding factors E12/E47) [3':R38444,5':R12870]   |
| RAB28                                                       | -0.380   | RAB28, member RAS oncogene family [3':W72006,5':W76604]                                              |
| WAC                                                         | -0.380   | WW domain-containing adapter with a coiled-coil region [3':W02723,5':W24754]                         |
| ATP11B                                                      | -0.379   | ATPase, Class VI, type 11B [3':AA010005*,5':NA]                                                      |
| DCLRE1A                                                     | -0.373   | DNA cross-link repair 1A (PSO2 homolog, S. cerevisiae) [3':AA011189,5':AA010781]                     |
| HSD17B8                                                     | -0.373   | hydroxysteroid (17-beta) dehydrogenase 8 [3':AA055098*,5':NA]                                        |
